# Supplementary material for: 36 weeks of Multicomponent Training Reverse Strength Sequels in Mastectomy Arm, Improves Functional Fitness and Quality of Life of Breast Cancer Survivors: A Machine Learning-Assisted Experimental Trial
Source: Research Square preprint supplement (doi:10.21203/rs.3.rs-3887734/v1), 2024-01-30
Supplement: Supplementary file 1 [file 206c803328b6a98422ce212b.docx]

| **Weekdays** | **Warm-up** | **MCT** **session** | **Col down** |
| --- | --- | --- | --- |
| Monday | 5 minutes of moderate walking + 3 minutes of mobility and stretching exercise for major muscle groups | Objective: Aerobic resistance + flexibility  Session: 2 sets of 10 min, each one composed of 5 minutes of continuous aerobic gymnastics and dance movements + 3 sets of 8 repetitions of stretching exercises for major muscle groups  RPE: 12-14 on the BORG scale | 5 minutes of breathing exercises + soft stretching for major muscle groups |
| Wednesday | 5 minutes of moderate walking + 3 minutes of mobility and stretching exercise for the major muscle groups | Objective: Aerobic resistance + static/dynamic balance  Session: 2 sets of 10 min, each one composed of 5 minutes of continuous aerobic gymnastics and dance movements + 5 minutes of dynamic and static balance exercises RPE: 12-14 on the BORG scale | 5 minutes of breathing exercises + soft stretching for major muscle groups |
| Thursday | 5 minutes of moderate walking + 3 minutes of mobility and stretching exercise for major muscle groups | Objective: Aerobic resistance + muscle strength  Session: 2 sets of 10 min, with 1 minute composed of 5 minutes of continuous aerobic gymnastics and dance movements +  3 sets of 12-15 repetitions of resistance exercises involving free weights and elastic bands for the upper and lower limb muscles + 5 minutes of  dynamic and static balance exercises  RPE: 12-14 on the BORG scale | 5 minutes of breathing exercises + soft stretching for major muscle groups |
