# Supplementary material for: 36 weeks of Multicomponent Training Reverse Strength Sequels in Mastectomy Arm, Improves Functional Fitness and Quality of Life of Breast Cancer Survivors: A Machine Learning-Assisted Experimental Trial
Source: Research Square preprint supplement (doi:10.21203/rs.3.rs-3887734/v1), 2024-01-30
Supplement: Supplementary file 2 [file 44cac852fa73a48602241d1d.docx]

| **Variables** | **Baseline** | **6 Months** | ***% Change*** | **9 Months** | ***% Change*** | ***p*** | ***η2*** |
| --- | --- | --- | --- | --- | --- | --- | --- |
| PFP | 86.6 ± 13.3 | 86.6 ± 13.3 | n.s | 93.3 ± 6.6 | n.s | n.s | n.s |
| DA Functionality | 66.6 ± 50 | 83.3 ± 33.3 | 25% | 100.0 ± 16.6 a | 50.0 | 0.048* | 0.320 |
| Cognition | 66.6 ± 33.3 | 83.3 ± 16.6 | n.s | 83.3 ± 16.6 | n.s | n.s | n.s |
| Emotional | 75.0 ± 41.6 | 83.3 ± 8.3 | 11% | 100.0 ± 16.6 a | 33.0 | 0.015* | 0.280 |
| Social | 100.0 ± 34 | 83.3 ± 33.3 | n.s | 83.3 ± 16.6 | n.s | n.s | n.s |
| Pain | 50.0 ± 33 | 50.0 ± 33.3 | n.s | 16.6 ± 50ab | -66.8 | 0.015* | 0.141 |
| Fatigue | 44.0 ± 44 | 22.2 ± 44.4 | -50% | 11.0 ± 22.2a | -75.0 | 0.002** | 0.317 |
| Global Health/QoL | 58.0 ± 16 | 58.3 ± 8.2 | n.s | 91.6 ± 25.1ab | 57.0 | 0.037* | 0.380 |
| Apettite Loss | 0.0 ± 0.0 | 0.0 ± 33.3 | n.s | 0.0 ± 33.3 | n.s | n.s | n.s |
| Insominia | 66.6 ± 66.6 | 33.3 ± 33.3 | n.s | 33.3 ± 33.3 | n.s | n.s | n.s |
| Constipation | 0.0 ± 33.3 | 0.0 ± 33.3 | n.s | 0.0 ± 0.0 | n.s | n.s | n.s |
| Diarrhea | 0.0 ± 0.0 | 0.0 ± 0.0 | n.s | 0.0 ± 0.0 | n.s | n.s | n.s |
| Financial Impact | 0.0 ± 33.3 | 0.0 ± 33.3 | n.s | 0.0 ± 33.3 | n.s | n.s | n.s |
