# Supplementary material for: 36 weeks of Multicomponent Training Reverse Strength Sequels in Mastectomy Arm, Improves Functional Fitness and Quality of Life of Breast Cancer Survivors: A Machine Learning-Assisted Experimental Trial
Source: Research Square preprint supplement (doi:10.21203/rs.3.rs-3887734/v1), 2024-01-30
Supplement: Supplementary file 3 [file 65f9465b3339b593f2da0c3d.docx]

| Subjects (n= 8) |  |
| --- | --- |
| Age (Years) | 64.0 ± 8.6 |
| Body weight (Kg) | 73.1 ± 12.2 |
| Height (m) | 1.63 ± 0.07 |
| BMI (Kg/m²) | 27.4 ± 2.8 |
| Breast cancer treatment | Number of subjects |
| Radioterapy | 4 |
| Quimioterapy | 7 |
| Endocrinoterapy | 2 |
| Immunoterapy | 1 |
| Type of breast cancer surgery | Number of subjects |
| Breast-conserving surgery | 4 |
| Mastectomy | 4 |
| Years after diagnostic | 5.5 ± 11 |
