# Supplementary material for: 36 weeks of Multicomponent Training Reverse Strength Sequels in Mastectomy Arm, Improves Functional Fitness and Quality of Life of Breast Cancer Survivors: A Machine Learning-Assisted Experimental Trial
Source: Research Square preprint supplement (doi:10.21203/rs.3.rs-3887734/v1), 2024-01-30
Supplement: Supplementary file 4 [file 6c3be4e634b2f1ed8e50e513.docx]

| Variables | Baseline | 6 Months | % change | 9 Months | % change | *p* | *η2* |
| --- | --- | --- | --- | --- | --- | --- | --- |
| BMI (Kg/m2) | 27.4 ± 2 | 27.2 ± 3 | -0.72% | 26.7 ± 3ab*** | -2.55%a | < 0.001 | 0.630 |
| LMM (Kg) | 43.3 ± 4.9 | 44 ± 4.7 | 0.43% | 44 ± 4 .8 | n.s | n.s | n.s |
| BFM% | 37 ± 5 | 36 ± 6 | -2.7 % | 33 ± 6ab*** | -10.8 %a | < 0.001 | 0.765 |
| VFM (Levels) | 9.4 ± 1.5 | 9 ± 2 | n.s | 8.4 ± 2 | n.s | n.s | n.s |
| BM (Kg) | 2.31 ± 0.26 | 2.31 ± 0.26 | n.s | 2.31 ± 0.26 | n.s | n.s | n.s |
| BasalMET (Kcal) | 1373 ± 156 | 1378 ±1 60 | n.s | 1350 ± 162 | n.s | n.s | n.s |
| % Water (%) | 45.9 ± 3 | 46.1 ± 3.4 | n.s | 45.8 ± 3.7 | n.s | n.s | n.s |
